# Supplementary material for: Prostate cancer screening with prostate-specific antigen (PSA) test: a clinical practice guideline
Source: PubMed Central journal article supplement — BMJ. 2018 Sep 5;362:k3581. doi: 10.1136/bmj.k3581 (PMC6283372; doi:10.1136/bmj.k3581), 2018-09-05
Supplement: tikk045409.w1.pdf [file tikk045409.w1.pdf]

## **Appendix 1: Full list of authors and their declarations of interests**

### Chair:

**Kari Tikkinen, MD, PhD (urologist, methodologist, adjunct professor)**

Department of Urology, University of Helsinki and Helsinki University Hospital, Helsinki, Finland

Department of Public Health, University of Helsinki, Helsinki, Finland

### Methods Chair:

**Thomas Agoritsas, MD, PhD (general internist, methodologist, assistant professor)**

Division General Internal Medicine & Division of Clinical Epidemiology, University Hospitals of Geneva, Geneva, Switzerland

Department of Health Research Methods, Evidence, and Impact, McMaster University, Hamilton, Canada

### Clinical experts:

**Reto Auer, MD, MAS (general practitioner)**

Institute of Primary Health Care, University of Bern, Bern, Switzerland

**Marco Blanker, MD, PhD (general practitioner)**

Department of General Practice and Elderly Medicine, University Medical Centre-Groningen, University of Groningen, Groningen, Netherlands

**Philipp Dahm, MD, MHSc (urologist, methodologist)**

Urology Section, Minneapolis VAMC and Department of Urology, University of Minnesota, Minneapolis, USA

**Anja Fog Heen, MD, PhD student (general internist)**

Institute of Health and Society, Faculty of Medicine, University of Oslo, Oslo, Norway

**Noelle Junod, MD, PhD (general practitioner)**

Unit of Primary Care Medicine, Faculty of Medicine, University of Geneva, Geneva, Switzerland

**Helen Macdonald, MD (general practitioner, editor)**

The BMJ, London, UK

**Johanna Sommer, MD (general practitioner)**

Institute of Primary Care, Geneva University Hospitals, Geneva, Switzerland

**Jérôme Stirnemann, MD, PhD (general internist)**

Division General Internal Medicine, University Hospitals of Geneva, Geneva, Switzerland

**Manabu Yoshimura, MD (general practitioner)**

School of Medicine, University of Miyazaki, Miyazaki, Japan

### Patient partners:

**Awah Cletus Fobuzi**

Cochrane Consumers; Bamenda, Cameroon

Coalition of Civil Society Organizations Cameroon, Bamenda, Cameroon

**Bill Vaughan**

Citizens United for Evidence-Based Medicine; Virginia, USA

**Russell Wheeler**

Cochrane Consumers, London, UK

Methodology and research content experts:

**Gordon Guyatt, MD, MSc (general internist, distinguished professor)**

Department of Health Research Methods, Evidence, and Impact, McMaster University, Hamilton, Canada

**Lyubov Lytvyn, MSc, PhD student (patient partnership liaison)**

Department of Health Research Methods, Evidence, and Impact, McMaster University, Hamilton, Canada

**Reed A.C. Siemieniuk, MD, PhD student (general internist, methodologist)**

Department of Health Research Methods, Evidence, and Impact, McMaster University, Hamilton, Canada

Department of Medicine, University of Toronto, Toronto, Canada

**Per Olav Vandvik, MD, PhD (general internist, assistant professor)**

Institute of Health and Society, Faculty of Medicine, University of Oslo, Oslo, Norway □

Department of Medicine, Innlandet Hospital Trust-division, Gjøvik, Norway

**Robin Vernooij, PhD (methodologist)**

Netherlands Comprehensive Cancer Organisation Netherlands

All panel members were pre-screened for conflicts of interest prior to the guideline process that resulted in the *BMJ* Rapid Recommendations. The pre-screening was performed by the RapidRecs Executive team from the non-profit organisation MAGIC ([www.magicproject.org](http://www.magicproject.org)) with support and approval from at least two unconflicted *BMJ* editors. No financial conflicts of interest were allowed (specifically, no financial ties to medical device companies with any stake in prostate cancer screening, or to public or private healthcare funders) and intellectual and professional conflicts of interest were managed appropriately (see appendix 3: Methods for *BMJ* Rapid Recommendations). Panel members could not have a conflict for the past three years and do not anticipate a conflict arising in the foreseeable future, which we defined as at least one year.

**Disclosures**

Financial disclosures: No panel members had any financial conflicts of interest to disclose related to this clinical question.

Professional disclosures: The majority of the panel members routinely see patients who are eligible for prostate cancer screening. No other professional conflicts of interest to disclose.

Intellectual disclosures: Kari Tikkinen is the lead author on article about prostate cancer decision aids, and Thomas Agoritsas, Philipp Dahm, Gordon Guyatt, and Robin Vernooij are co-authors. Philipp Dahm as the lead author of the systematic review that formed the evidence base for this guideline, and a previous Cochrane review on the same topic. Reto Auer co-authored publications related to PSA screening decision aids for use in primary care. Marco Blanker has conducted a workshop on PSA testing, for GPs and GP trainees (paid) for the Dutch Society of General Practitioners (Nederlands Huisartsengenootschap, NHG), as well as published a review article, editorial for the review article, and cost effectiveness study related to PSA screening. Noelle Junod has written an article about the value of shared decision making in cancer screening. Thomas Agoritsas, Philipp Dahm, Gordon Guyatt, Lyubov Lytvyn, Reed Siemieniuk, Kari Tikkinen and Per Vandvik, are members of the GRADE Working Group – BMJ Rapid Recommendations adheres to GRADE methods. No panel member had any other relevant intellectual conflict to disclose.
