# Supplementary material for: Prostate cancer screening with prostate-specific antigen (PSA) test: a clinical practice guideline
Source: PubMed Central journal article supplement — BMJ. 2018 Sep 5;362:k3581. doi: 10.1136/bmj.k3581 (PMC6283372; doi:10.1136/bmj.k3581), 2018-09-05
Supplement: tikk045409.w3.pdf [file tikk045409.w3.pdf]

## Modelling approach used to estimate the absolute number of biopsy and treatment related complications between men who underwent screening versus those not

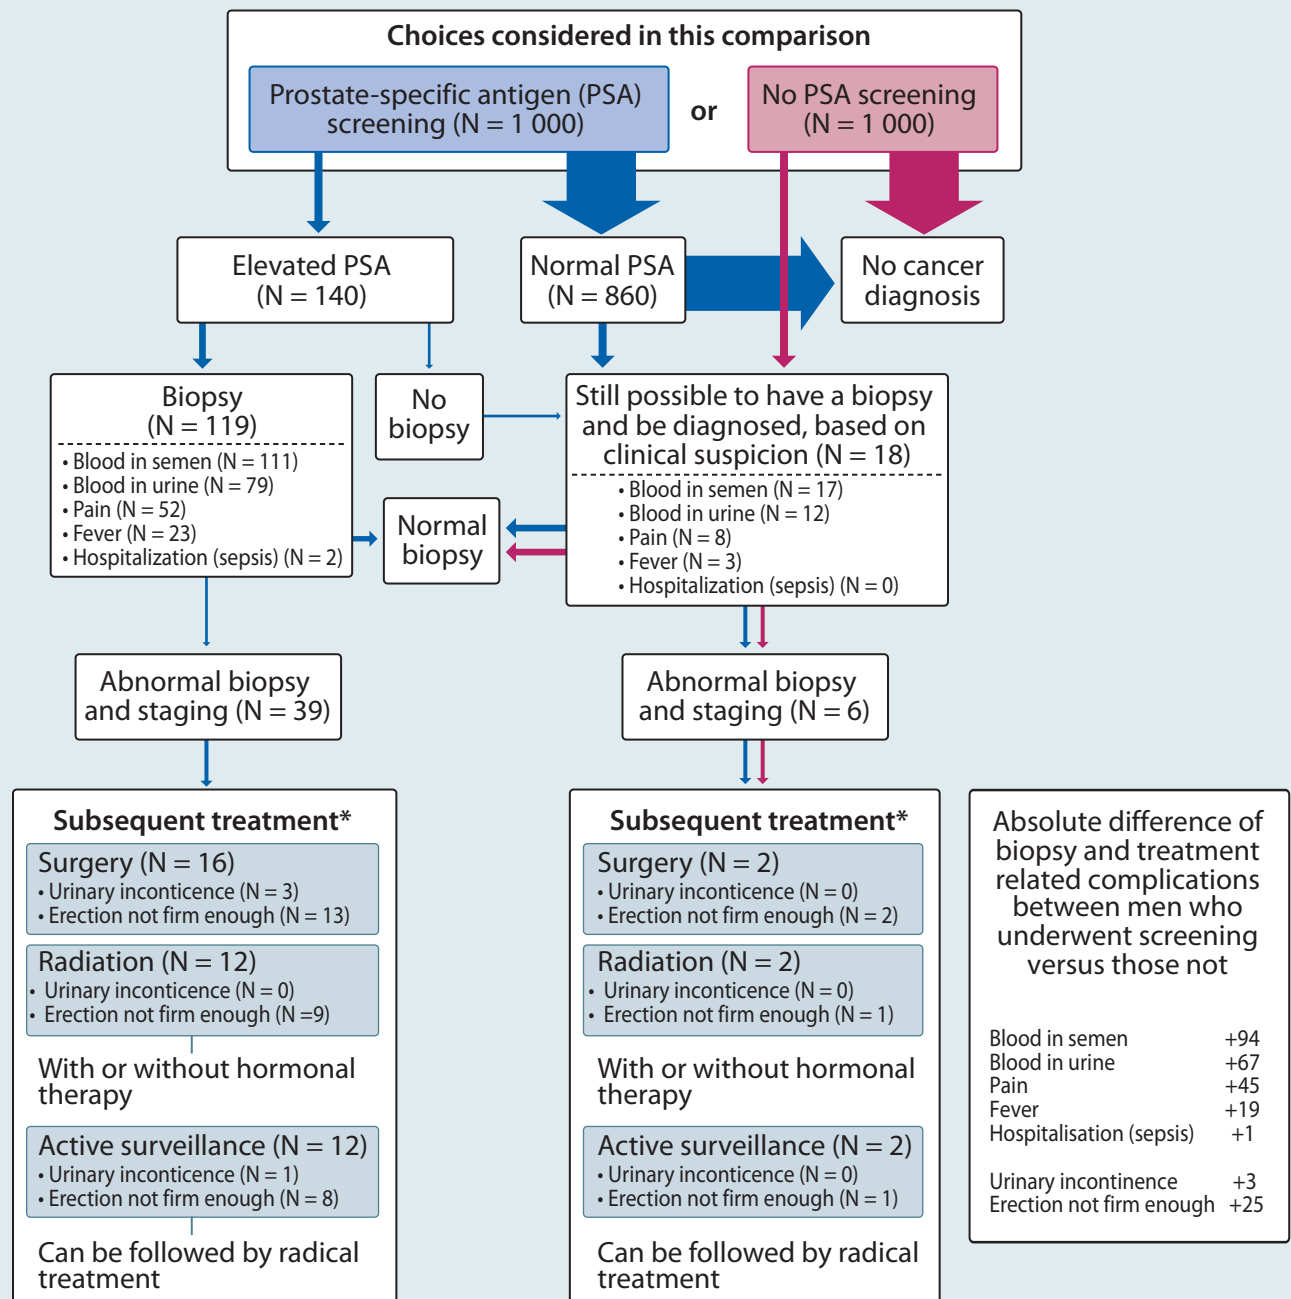

\* The distributions of treatment modalities were estimated using the NIH's Surveillance, Epidemiology, and End Results (SEER) program (Miller KD et al. Cancer treatment and survivorship statistics, 2016. *CA Cancer J Clin* 2016;66(4):271-89.)
