# Supplementary material for: Prostate cancer screening with prostate-specific antigen (PSA) test: a clinical practice guideline
Source: PubMed Central journal article supplement — BMJ. 2018 Sep 5;362:k3581. doi: 10.1136/bmj.k3581 (PMC6283372; doi:10.1136/bmj.k3581), 2018-09-05
Supplement: tikk045409.wi.pdf [file tikk045409.wi.pdf]

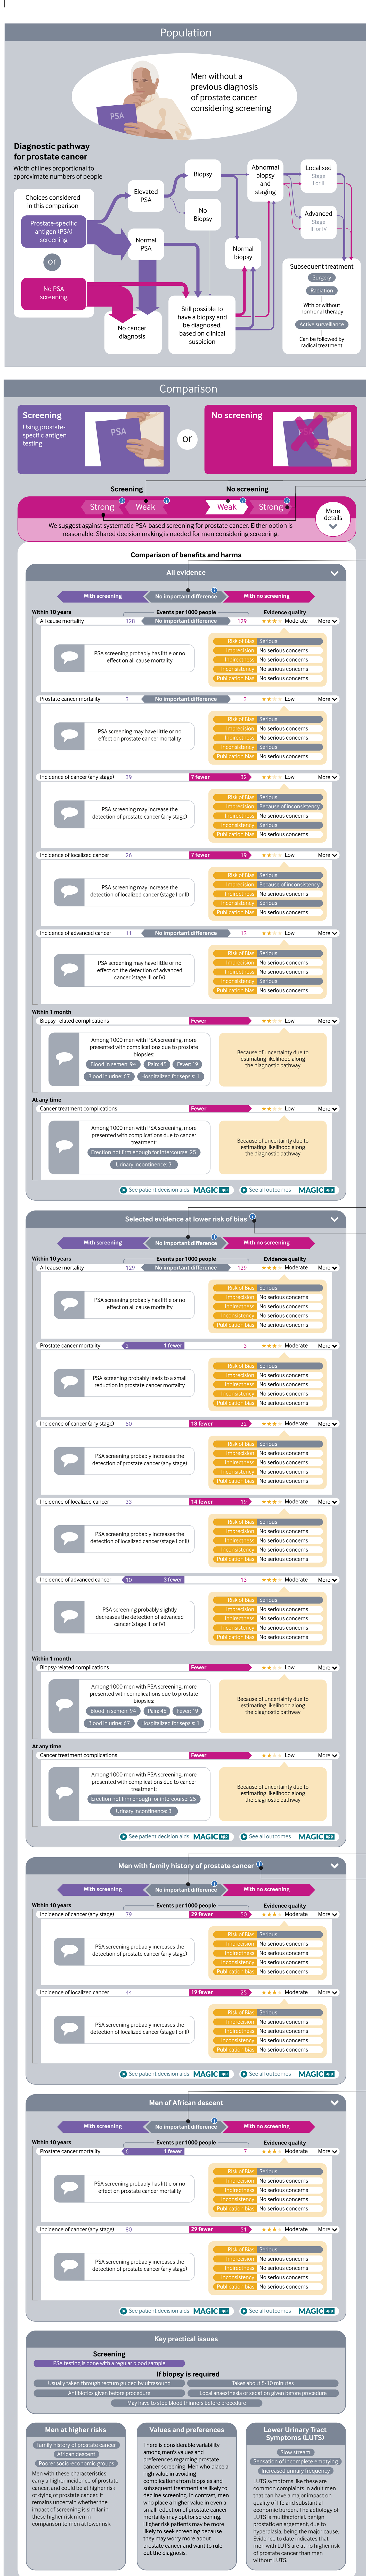

This section is hidden until the "more" button is clicked

This section is hidden until the "more" button is clicked

This section is hidden until the "more" button is clicked

This section is hidden until the "more" button is clicked

This section is hidden until the "more" button is clicked

This section is hidden until the "more" button is clicked

This section is hidden until the "more" button is clicked

This section is hidden until the "more" button is clicked

This section is hidden until the "more" button is clicked

This section is hidden until the "more" button is clicked

This section is hidden until the "more" button is clicked

This section is hidden until the "more" button is clicked

This section is hidden until the "more" button is clicked

This section is hidden until the "more" button is clicked

This section is hidden until the title is clicked

This section is hidden until the title is clicked

This section is hidden until the title is clicked

Most people would likely want this option. Benefits outweigh harms for the majority, but not for everyone.

All or nearly all informed people would likely want this option. Benefits outweigh harms for almost everyone.

The panel found that this difference was not important for most people, because the intervention effects were negligible and/or very imprecise (such as statistically not significant).

The panel found that this difference was not important for most people, because the intervention effects were negligible and/or very imprecise (such as statistically not significant).

This section includes only data from the ESPAC trial conducted in 162,243 participants in 9 European countries

The panel found that this difference was not important for most people, because the intervention effects were negligible and/or very imprecise (such as statistically not significant).

Family history defined positive if man's father or at least one brother had been diagnosed with prostate cancer

The panel found that this difference was not important for most people, because the intervention effects were negligible and/or very imprecise (such as statistically not significant).
